# Supplementary material for: Mortality rates and the causes of death related to diabetes mellitus in Shanghai Songjiang District: an 11-year retrospective analysis of death certificates
Source: PubMed Central journal article supplement (PMC4559917; doi:10.1186/s12902-015-0042-1), 2015-09-04

■ Type 2 diabetes    ■ Unspecified diabetes    ■ Other specified diabetes

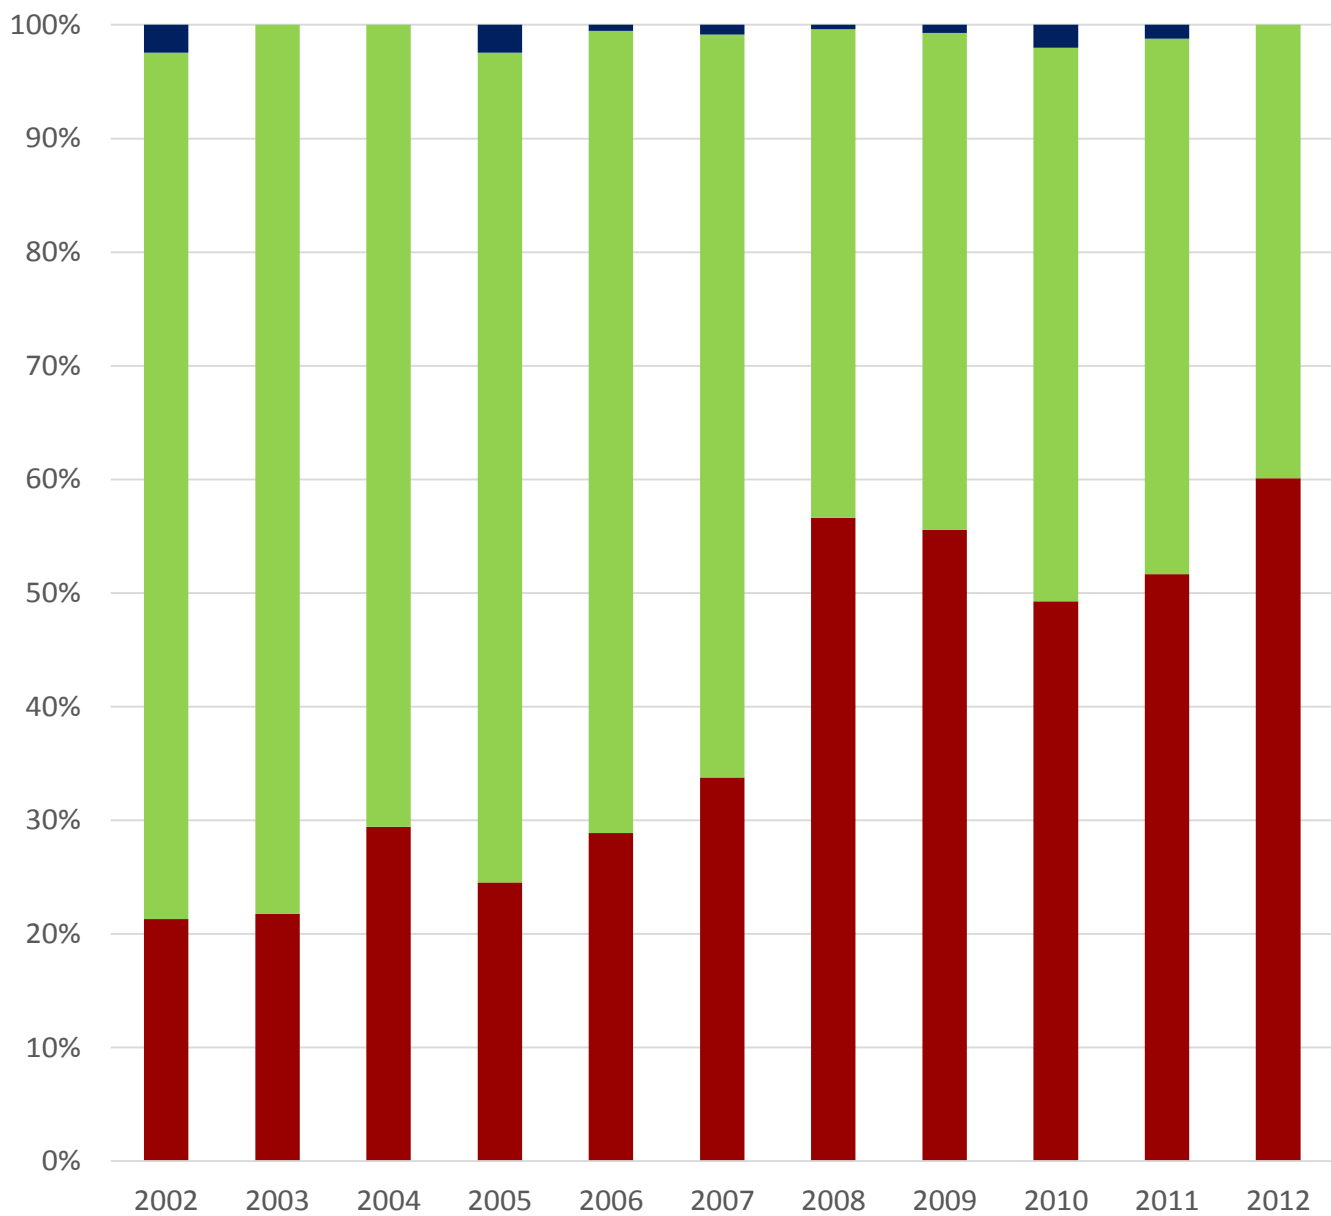

Supplement: 12902_2015_42_MOESM2_ESM.pdf [file 12902_2015_42_MOESM2_ESM.pdf]
