# Supplementary material for: Mortality rates and the causes of death related to diabetes mellitus in Shanghai Songjiang District: an 11-year retrospective analysis of death certificates
Source: Springer Nature journal article supplement (doi:10.1186/s12902-015-0042-1), 2015-09-04
Supplement: MOESM3 [file 9753936]

Table. Annual number of deaths according to different sub-groups from 2002 to 2012

| Year  | Total population | All causes of death | Deaths related to diabetes | Deaths with diabetes and CVD comorbidity | Diabetes as the underlying cause of death | Ischaemic heart disease* | Cerebrovascular diseases <sup>†</sup> | Renal complications <sup>‡</sup> | Without complications <sup>#</sup> |
|-------|------------------|---------------------|----------------------------|------------------------------------------|-------------------------------------------|--------------------------|---------------------------------------|----------------------------------|------------------------------------|
| 2002  | 500579           | 3570                | 122                        | 76                                       | 57                                        | 4                        | 18                                    | 8                                | 30                                 |
| 2003  | 505016           | 3757                | 170                        | 110                                      | 66                                        | 14                       | 28                                    | 10                               | 36                                 |
| 2004  | 510612           | 3437                | 153                        | 88                                       | 53                                        | 7                        | 23                                    | 8                                | 29                                 |
| 2005  | 518260           | 3605                | 163                        | 112                                      | 47                                        | 16                       | 34                                    | 9                                | 19                                 |
| 2006  | 527141           | 3404                | 194                        | 147                                      | 71                                        | 16                       | 37                                    | 19                               | 23                                 |
| 2007  | 537428           | 3396                | 234                        | 169                                      | 83                                        | 20                       | 45                                    | 14                               | 37                                 |
| 2008  | 546576           | 3602                | 256                        | 176                                      | 68                                        | 22                       | 48                                    | 12                               | 30                                 |
| 2009  | 554941           | 3607                | 288                        | 201                                      | 73                                        | 30                       | 57                                    | 16                               | 26                                 |
| 2010  | 567737           | 3820                | 347                        | 275                                      | 79                                        | 25                       | 94                                    | 22                               | 24                                 |
| 2011  | 577609           | 3768                | 331                        | 265                                      | 78                                        | 39                       | 56                                    | 17                               | 13                                 |
| 2012  | 583981           | 4094                | 396                        | 324                                      | 87                                        | 39                       | 82                                    | 20                               | 25                                 |
| Total | -                | 40060               | 2654                       | 1943                                     | 762                                       | 232                      | 522                                   | 155                              | 292                                |

\* The number of death of diabetics with ischaemic heart disease (ICD-10 codes I20-I25) as underlying cause of death.

<sup>†</sup>The number of death of diabetics with cerebrovascular diseases (ICD-10 codes I60-I69) as underlying cause of death.

<sup>‡</sup>The number of death of diabetic renal complications (ICD-10 codes E10-E14 tailing the fourth character of 2) as underlying cause of death.

<sup>#</sup>The number of death of diabetics without complications (ICD-10 codes E10-E14 tailing the fourth character of 9) as underlying cause of death.
